# Supplementary material
Source: Elsevier journal article supplement (https://www.sciencedirect.com/science/article/pii/S0325754120300912)
Supplement: mmc1 [file S0325754120300912:mmc1.doc]

**Supplementary material.**

Table S1. Primers used for amplification targets of *Bordetella* species

PRIMER SEQUENCE Ref

IS*481* F 5’ –GATTCAATAGGTTGTATGCATGGTT- 3’ 22

R 5 ́ -TTCAGGCACACAAACTTGATGGGCG- 3’

*ptxA*–Pr F 5’ – CGCCAAGCTGAAGTAGCA- 3’ 22

R 5’ – AAGGAGCGTTCATGCCG- 3’

IS*1001*  F 5’ – CACCGCCTACGAGTTGGAGAT- 3’ 22

R 5’ – CCTCGACAATGCTGGTGTTCA- 3’

hIS*1001* F 5' – GTCCTGCGTGACGAACTCAA–3' 40

R 5' – CCGTGCCAATCGGTAAAGTT–3'

Table S2. Samples tested from August 2016 to July 2017

| **N°** | **Code** | **City** | **Sex** | **Age** | **Sample** |
| --- | --- | --- | --- | --- | --- |
| **1** | BP16-90 | Quito | F | 1 month | nasopharingeal swab |
| **2** | BP16-91 | Quito | F | 2 months | nasopharingeal swab |
| **3** | BP16-92 | Quito | F | 6 months | nasopharingeal swab |
| **4** | BP16-93 | Quito | M | 6 months | nasopharingeal swab |
| **5** | BP16-94 | Quito | M | 1 month | nasopharingeal swab |
| **6** | BP16-95 | Quito | M | 1 month | nasopharingeal swab |
| **7** | BP16-96 | Quito | M | 10 months | nasopharingeal swab |
| **8** | BP16-98 | Latacunga | M | 3 months | nasopharingeal swab |
| **9** | BP16-99 | Quito | F | 4 months | nasopharingeal swab |
| **10** | BP16-102 | Quito | F | 3 months | nasopharingeal swab |
| **11** | BP16-105 | Quito | M | 2 months | nasopharingeal swab |
| **12** | BP16-109 | Quito | M | 3 months | nasopharingeal swab |
| **13** | BP16-110 | Quito | M | 1 month | nasopharingeal swab |
| **14** | BP16-113 | Quito | F | 3 months | nasopharingeal swab |
| **15** | BP16-116 | Quito | M | 3 months | nasopharingeal swab |
| **16** | BP16-117 | Quito | M | 1 month | nasopharingeal swab |
| **17** | BP16-118 | Quito | M | 1 month | nasopharingeal swab |
| **18** | BP16-124 | Quito | F | 2 months | nasopharingeal swab |
| **19** | BP16-125 | Quito | F | 2 months | nasopharingeal swab |
| **20** | BP16-130 | Quito | F | 9 months | nasopharingeal swab |
| **21** | BP16-131 | Quito | M | 6 months | nasopharingeal swab |
| **22** | BP16-132 | Quito | F | 22 days | nasopharingeal swab |
| **23** | BP17-004 | Quito | F | 3 months | nasopharingeal swab |
| **24** | BP17-011 | Quito | F | 3 months | nasopharingeal swab |
| **25** | BP17-013 | Quito | M | 2 months | nasopharingeal swab |
| **26** | BP17-014 | Quito | M | 5 months | nasopharingeal swab |
| **27** | BP17-019 | Quito | M | 4 months | nasopharingeal swab |
| **28** | BP17-020 | Quito | M | 2 months | nasopharingeal swab |
| **29** | BP17-021 | Quito | F | 2 months | nasopharingeal swab |
| **30** | BP17-025 | Quito | F | 4 months | nasopharingeal swab |
| **31** | BP17-026 | Latacunga | M | 12 months | nasopharingeal swab |
| **32** | BP17-027 | Quito | F | 5 months | nasopharingeal swab |
| **33** | BP17-028 | Quito | F | 1 month | nasopharingeal swab |
| **34** | BP17-030 | Quito | M | 5 months | nasopharingeal swab |
| **35** | BP17-031 | Quito | M | 1 month | nasopharingeal swab |
| **36** | BP17-040 | Quito | M | 1 month | nasopharingeal swab |
| **37** | BP17-042 | Quito | M | 8 months | nasopharingeal swab |
| **38** | BP17-045 | Quito | F | 2 months | nasopharingeal swab |
| **39** | BP17-049 | Quito | F | 29 días | nasopharingeal swab |
| **40** | BP17-052 | Quito | M | 1 month | nasopharingeal swab |
| **41** | BP17-054 | Quito | F | 1 month | nasopharingeal swab |
| **42** | BP17-057 | Quito | M | 5 months | nasopharingeal swab |
| **43** | BP17-058 | Quito | M | 1 month | nasopharingeal swab |
| **44** | BP17-059 | Quito | M | 1 month | nasopharingeal swab |
| **45** | BP17-060 | Quito | M | 3 months | nasopharingeal swab |
| **46** | BP17-063 | Quito | F | 4 months | nasopharingeal swab |
| **47** | BP17-064 | Quito | F | 9 months | nasopharingeal swab |
| **48** | BP17-068 | Quito | F | 4 months | nasopharingeal swab |
| **49** | BP17-069 | Quito | F | 27 days | nasopharingeal swab |
| **50** | BP17-072 | Quito | M | 11 months | nasopharingeal swab |
| **51** | BP17-074 | Quito | M | 3 months | nasopharingeal swab |
| **52** | BP17-076 | Latacunga | F | 4 months | nasopharingeal swab |
| **53** | BP17-078 | Quito | M | 3 months | nasopharingeal swab |
| **54** | BP17-082 | Latacunga | M | 4 months | nasopharingeal swab |
| **55** | BP17-084 | Quito | M | 1 month | nasopharingeal swab |
| **56** | BP17-086 | Quito | M | 1 month | nasopharingeal swab |
| **57** | BP17-089 | Quito | M | 2 months | nasopharingeal swab |
| **58** | BP17-092 | Quito | F | 1 month | nasopharingeal swab |
| **59** | BP17-093 | Latacunga | M | 4 months | nasopharingeal swab |
| **60** | BP17-094 | Quito | F | 4 months | nasopharingeal swab |
| **61** | BP17-095 | Quito | F | 6 months | nasopharingeal swab |
| **62** | BP17-99 | Quito | F | 2 months | nasopharingeal swab |
| **63** | BP17-102 | Quito | M | 4 months | nasopharingeal swab |
| **64** | BP17-105 | Latacunga | F | 6 months | nasopharingeal swab |
| **65** | BP17-106 | Quito | F | 2 months | nasopharingeal swab |
| **66** | BP17-108 | Quito | M | 2 months | nasopharingeal swab |
| **67** | BP17-109 | Quito | F | 2 months | nasopharingeal swab |
| **68** | BP17-111 | Quito | F | 3 months | nasopharingeal swab |
| **69** | BP17-112 | Latacunga | M | 1 month | nasopharingeal swab |
| **70** | BP17-116 | Quito | M | 1 month | nasopharingeal swab |
| **71** | BP17-122 | Quito | F | 1 month | nasopharingeal swab |
| **72** | BP17-133 | Quito | F | 2 months | nasopharingeal swab |
| **73** | BP17-135 | Quito | M | 3 months | nasopharingeal swab |
| **74** | BP17-140 | Quito | M | 1 month | nasopharingeal swab |
| **75** | BP17-141 | Quito | M | 3 months | nasopharingeal swab |
| **76** | BP17-142 | Quito | F | 20 days | nasopharingeal swab |
| **77** | BP17-143 | Quito | M | 28 días | nasopharingeal swab |
| **78** | BP17-145 | Latacunga | F | 3 months | nasopharingeal swab |
| **79** | BP17-146 | Quito | M | 1 month | nasopharingeal swab |
| **80** | BP17-148 | Quito | M | 1 month | nasopharingeal swab |
| **81** | BP17-156 | Quito | F | 2 months | nasopharingeal swab |
| **82** | BP17-165 | Quito | M | 5 months | nasopharingeal swab |
| **83** | BP17-167 | Quito | M | 3 months | nasopharingeal swab |
| **84** | BP17-170 | Quito | F | 8 months | nasopharingeal swab |
| **85** | BP17-176 | Quito | F | 2 months | nasopharingeal swab |
| **86** | BP17-188 | Quito | M | 3 months | nasopharingeal swab |
